# Supplementary material
Source: Frontiers journal article supplement (https://www.frontiersin.org/articles/279671)
Supplement: Data_Sheet_1.pdf [file Data_Sheet_1.pdf]

# Supplementary Material:

## Navigating the Functional Landscape of Transcription Factors via Non-Negative Tensor Factorization Analysis of MEDLINE Abstracts

### 1 SUPPLEMENTARY TABLES AND FIGURES

#### 1.1 Supplementary Tables

**Table S1.** 10 KEGG pathways that were enriched most in ATMs across  $k$ .

| KEGG ID | Description                                                    | Frequency |
|---------|----------------------------------------------------------------|-----------|
| 5200    | Pathways in cancer - Mus musculus (mouse)                      | 1309      |
| 5166    | HTLV-I infection - Mus musculus (mouse)                        | 830       |
| 5215    | Prostate cancer - Mus musculus (mouse)                         | 707       |
| 5169    | Epstein-Barr virus infection - Mus musculus (mouse)            | 682       |
| 4010    | MAPK signaling pathway - Mus musculus (mouse)                  | 651       |
| 5152    | Tuberculosis - Mus musculus (mouse)                            | 651       |
| 4060    | Cytokine-cytokine receptor interaction - Mus musculus (mouse)  | 637       |
| 5220    | Chronic myeloid leukemia - Mus musculus (mouse)                | 623       |
| 5202    | Transcriptional misregulation in cancer - Mus musculus (mouse) | 602       |
| 5218    | Melanoma - Mus musculus (mouse)                                | 600       |

**Table S2.** 10 GO categories that were enriched most in ATMs across  $k$ .

| GO ID | Description                                                                        | Frequency |
|-------|------------------------------------------------------------------------------------|-----------|
| 10628 | positive regulation of gene expression                                             | 870       |
| 42127 | regulation of cell proliferation                                                   | 699       |
| 7507  | heart development                                                                  | 691       |
| 9887  | organ morphogenesis                                                                | 691       |
| 51091 | positive regulation of sequence-specific DNA binding transcription factor activity | 633       |
| 8083  | growth factor activity                                                             | 611       |
| 30324 | lung development                                                                   | 586       |
| 8283  | cell proliferation                                                                 | 569       |
| 1934  | positive regulation of protein phosphorylation                                     | 568       |
| 10468 | regulation of gene expression                                                      | 546       |

**Table S3.** Comparison of precision values between NTF and RegNetwork human curated database using ChIP-Seq datasets as gold standards.

| <b>TF (GSE Acc #)</b> | <b>NTF</b> | <b>RegNetwork</b> |
|-----------------------|------------|-------------------|
| Cebpa (GSM427088)     | 0.49473    | 0.245421          |
| Cebpa (GSM427093)     | 0.33641    | 0.130647          |
| E2f4 (GSM427091)      | 0.8174     | 0.837838          |
| E2f4 (GSM427094)      | 0.90689    | 0.918919          |
| Foxa1 (GSM427090)     | 0.11119    | 0                 |
| Foxa2 (GSM427089)     | 0.21049    | 0.157895          |

**Table S4.** Comparison of precision values between NTF and RegNetwork human curated database using TF knockout microarray datasets as gold standards.

| <b>TF (GSE Acc #)</b> | <b>NTF</b> | <b>RegNetwork</b> |
|-----------------------|------------|-------------------|
| Atoh1                 | 0.33073    | 0.428571          |
| Pax6                  | 0.37957    | 0.084848          |
| Otx2 (GSE21900)       | 0.36028    | 0.111111          |
| Otx2 (GSE27630)       | 0.41637    | 0                 |

## 1.2 Supplementary Figures

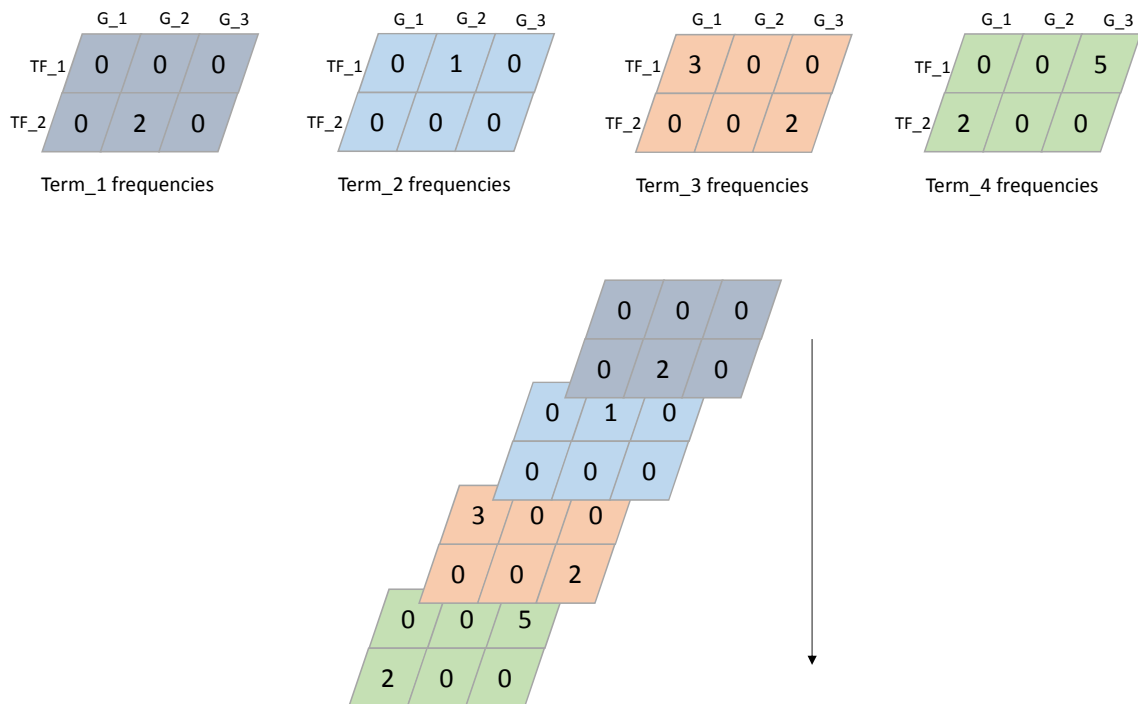

**Figure S1.** A toy example showing tensor construction for 4 terms (Term\_1, Term\_2, ..., Term\_4), 3 genes (G\_1, G\_2, G\_3), and 2 TFs (TF\_1, TF\_2). For each term, the frequency of its occurrence in abstracts shared by each gene-TF pair is determined. These frequencies are stored in a matrix of size  $\#Genes \times \#TFs$ . Once a matrix is created for each term, all matrices can be layered vertically together to form a tensor of size  $\#Terms \times \#Genes \times \#TFs$ .

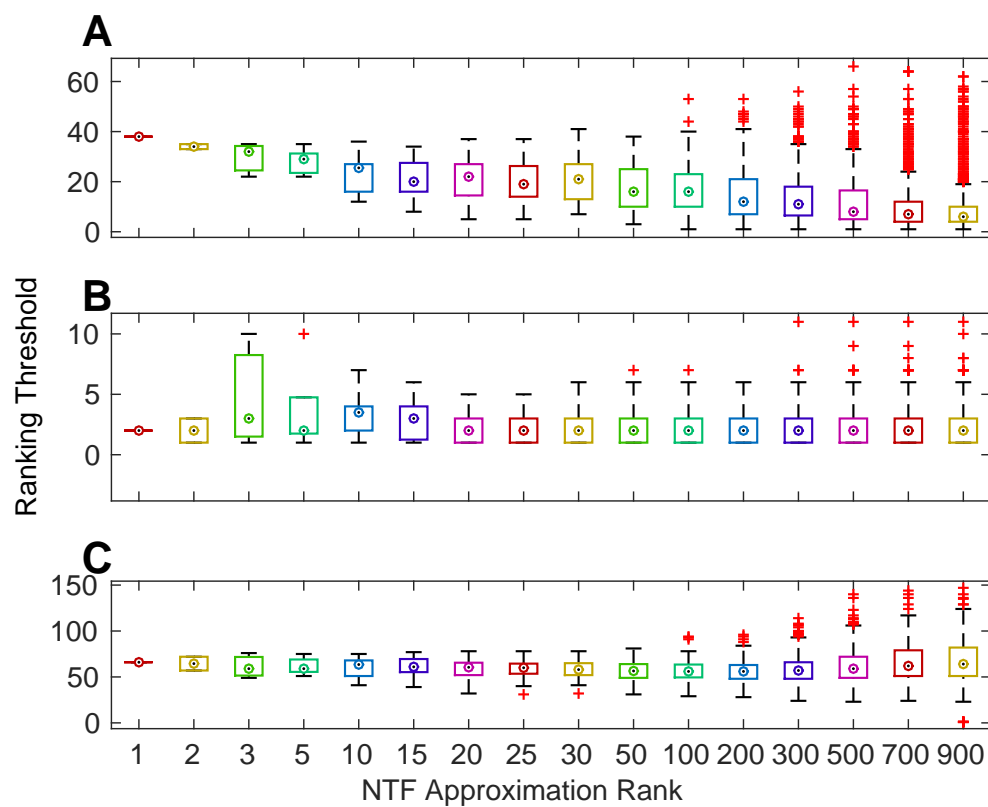

**Figure S2.** Distribution of numbers of genes (A), TFs (B) and terms (C) in the ATMs in various  $k$ -factorizations.

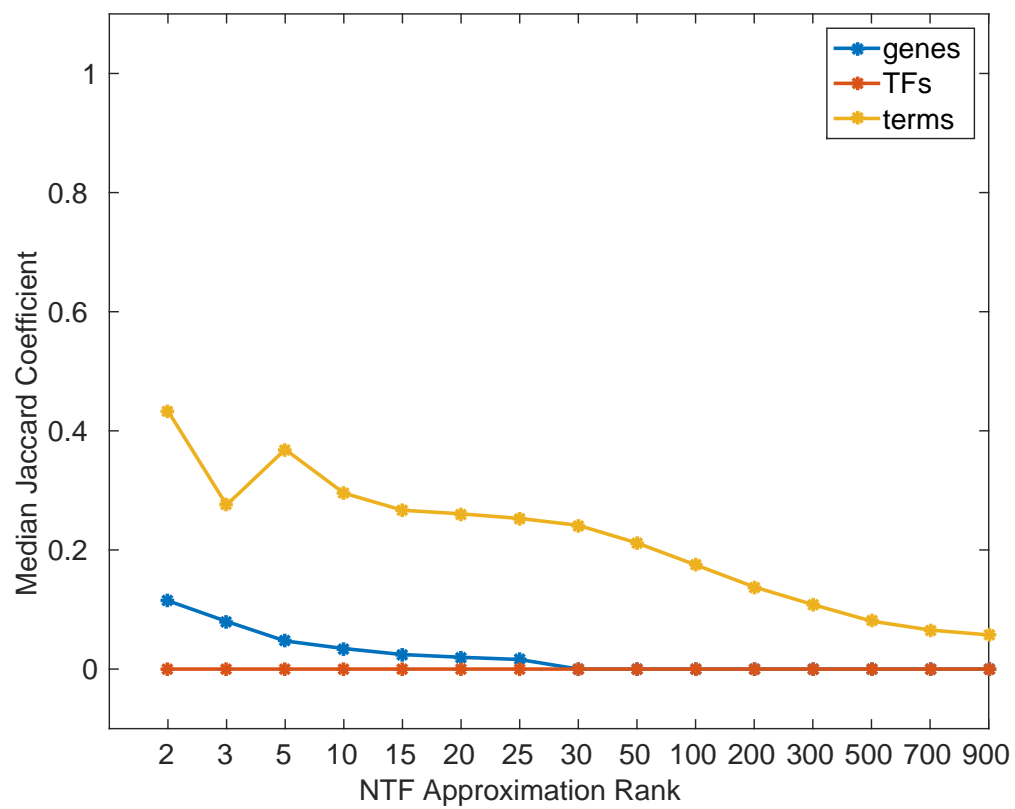

**Figure S3.** Redundancy between the terms, genes and TFs in the ATMs across various  $k$ -factorizations.

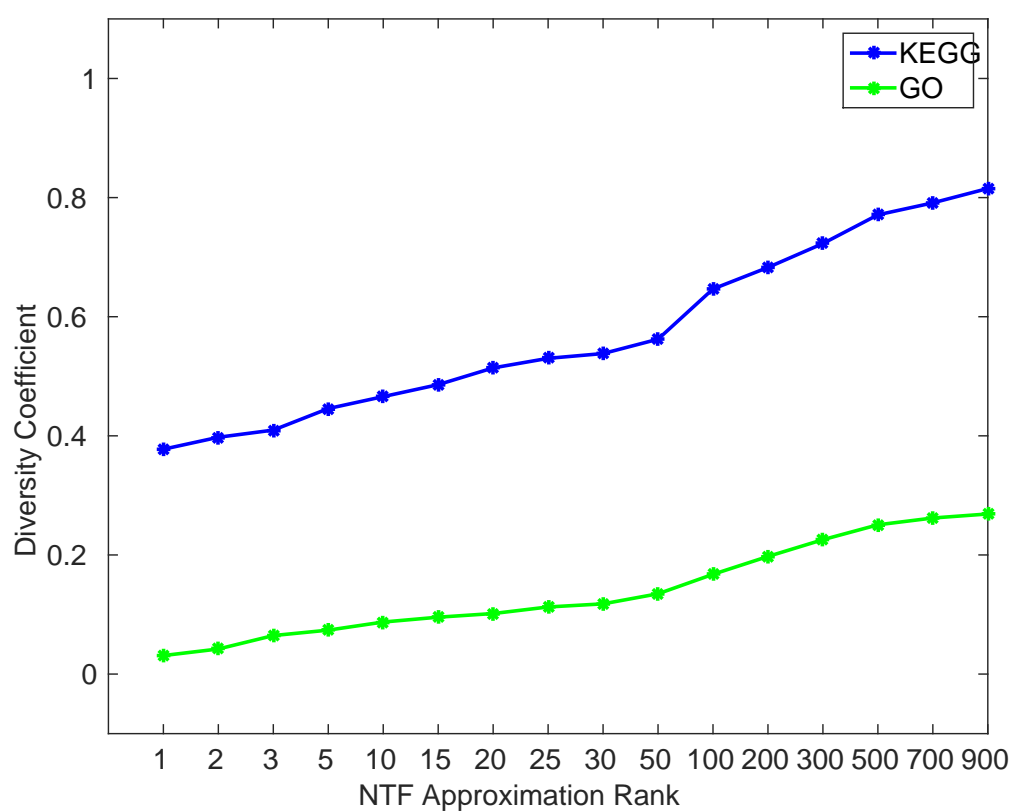

**Figure S4.** Diversity coefficients of the ATMs in terms of enrichment in KEGG pathways and GO categories in the various  $k$ -factorizations.

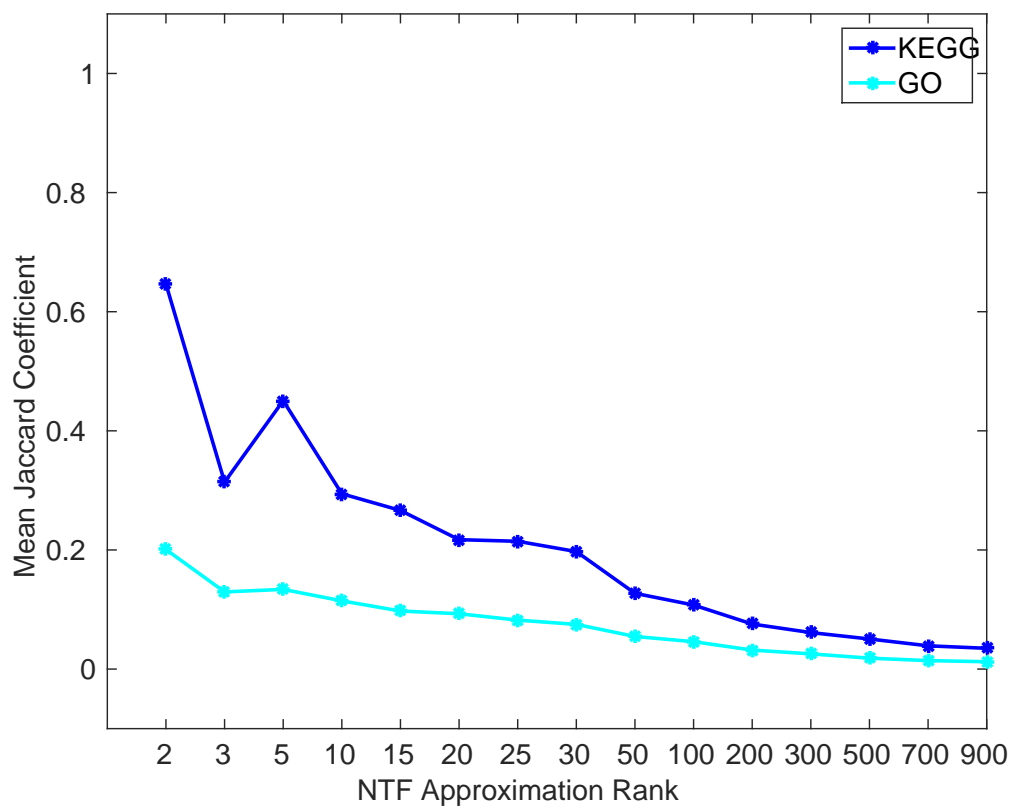

**Figure S5.** Redundancy between the ATMs in terms of enrichment in KEGG pathways and GO categories in the various  $k$ -factorizations.
